# Supplementary material for: Inactivation of the Kv2.1 channel through electromechanical coupling
Source: PubMed Central journal article supplement (PMC10567553; doi:10.1038/s41586-023-06582-8), 2023-09-27
Supplement: 41586_2023_6582_MOESM1_ESM.pdf [file 41586_2023_6582_MOESM1_ESM.pdf]

---

**Supplementary information**

---

**Inactivation of the Kv2.1 channel through  
electromechanical coupling**

---

In the format provided by the  
authors and unedited

## Supplementary information

### Inactivation of the Kv2.1 channel through electromechanical coupling

Ana I. Fernández-Mariño <sup>1†</sup>, Xiao-Feng Tan <sup>1†</sup>, Chanhyung Bae <sup>1†</sup>, Kate Huffer <sup>1,2</sup>,  
Jiansen Jiang <sup>3</sup> and Kenton J. Swartz <sup>1\*</sup>

<sup>1</sup> Molecular Physiology and Biophysics Section, Porter Neuroscience Research Center, National Institute of Neurological Disorders and Stroke, National Institutes of Health, Bethesda, MD 20892

<sup>2</sup> Department of Biology, Johns Hopkins University, 3400 N. Charles Street, Baltimore, MD 21218

<sup>3</sup> Laboratory of Membrane Proteins and Structural Biology and Biophysics Center, National Heart, Lung, and Blood Institute, National Institutes of Health, Bethesda, MD 20892

† These authors contributed equally to this work

\* Corresponding author. Email: [swartzk@ninds.nih.gov](mailto:swartzk@ninds.nih.gov)

## Table of Contents

|           |                                                                                                                          |
|-----------|--------------------------------------------------------------------------------------------------------------------------|
| Page 3    | Supplementary Information Figure 1  <br>Data processing workflow for the structure of Kv2.1 (1-598)                      |
| Page 4    | Supplementary Information Figure 2  <br>Data processing workflow for the structure of the L403A mutant of Kv2.1 (1-598). |
| Page 5    | Supplementary Information Table 1                                                                                        |
| Pages 6-7 | Supplementary Information Figure 3  <br>Structure-based sequence alignment of Kv, Cav and Nav channels                   |
| Page 8    | Supplementary Information Figure 4  <br>Uncropped gel from Extended Data Fig. 1d                                         |

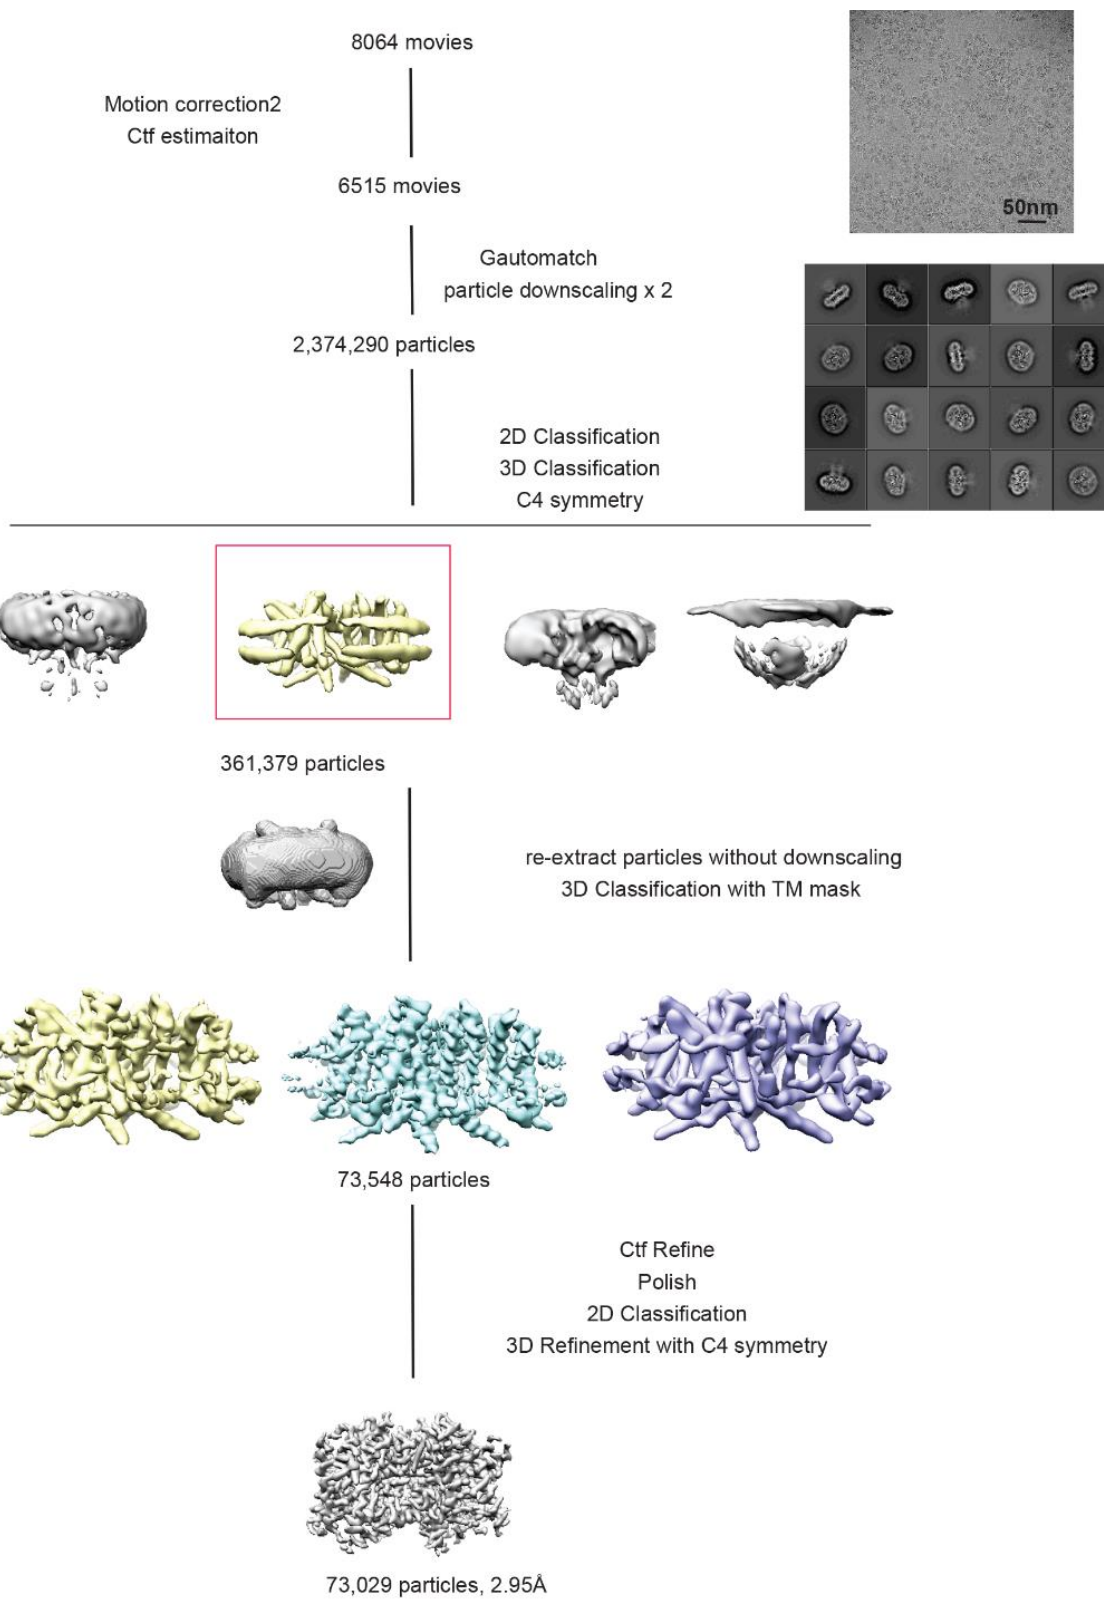

Supplementary Information Figure 1|

Data processing workflow for the structure of Kv2.1 (1-598)

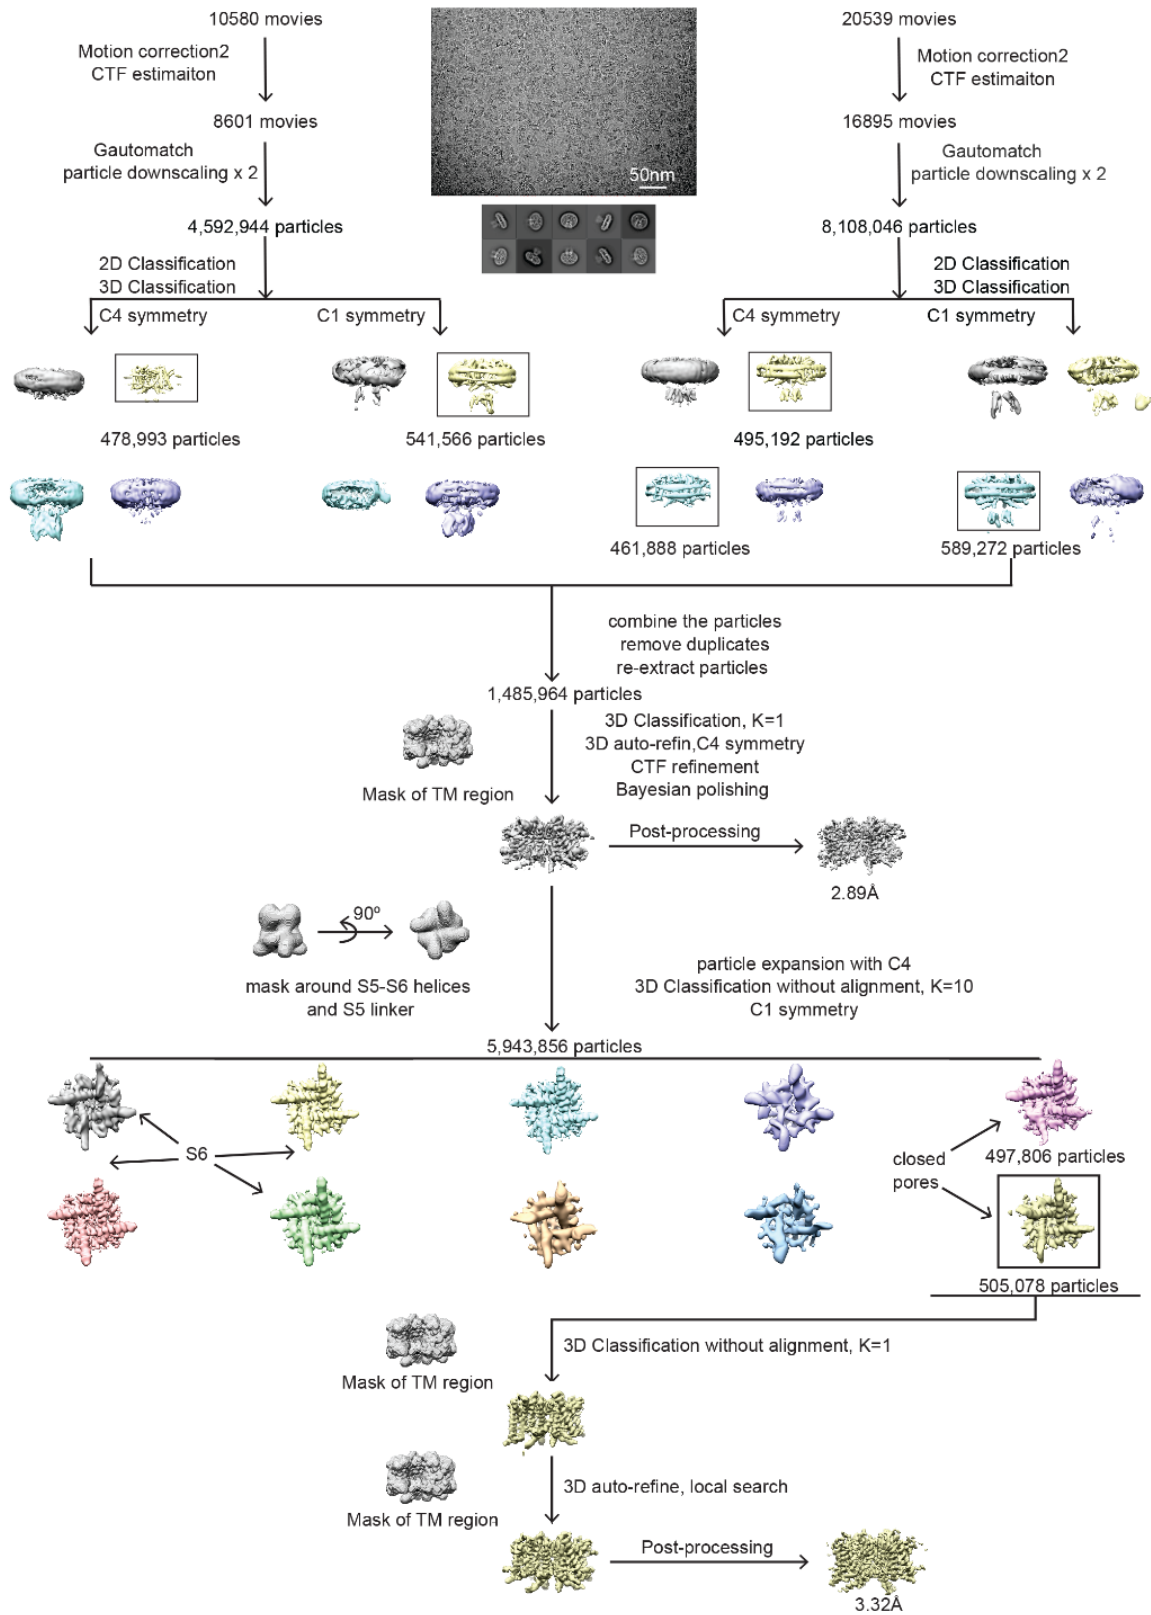

Supplementary Information Figure 2 |

Data processing workflow for the structure of the L403A mutant of Kv2.1 (1-598)

Supplementary Information Table 1.

Gating properties of epileptic encephalopathy mutations in Kv2.1.

|          | $V_{1/2}$ (mV) | SEM | z   | SEM | n | y |
|----------|----------------|-----|-----|-----|---|---|
| Kv2.1 WT | -4.8           | 2.0 | 3.7 | 0.2 | 4 | 2 |
| S198F    | 51.1           | 3.3 | 1.1 | 0.1 | 5 | 2 |
| T206K    | 13.7           | 4.5 | 1.0 | 0.1 | 3 | 2 |
| T206M    | 11.1           | 4.6 | 1.7 | 0.3 | 3 | 2 |
| L207P    | -9.4           | 5.4 | 1.2 | 0.2 | 3 | 2 |
| R302C    | -82.0          | 3.5 | 1.6 | 0.4 | 5 | 2 |
| R308H    | 71.6           | 3.3 | 0.9 | 0.0 | 6 | 4 |
| K387N    | -15.1          | 1.0 | 5.1 | 0.7 | 6 | 6 |

Voltage-activation (G-V) relations were obtained using tail current measurements in 100 mM external  $K^+$ . The Boltzmann equation was fit to G-V relations to obtain values of  $V_{1/2}$  (midpoint) and z (steepness). Values of n indicate the number of cells studied and values of y indicate the number of independent experiments.





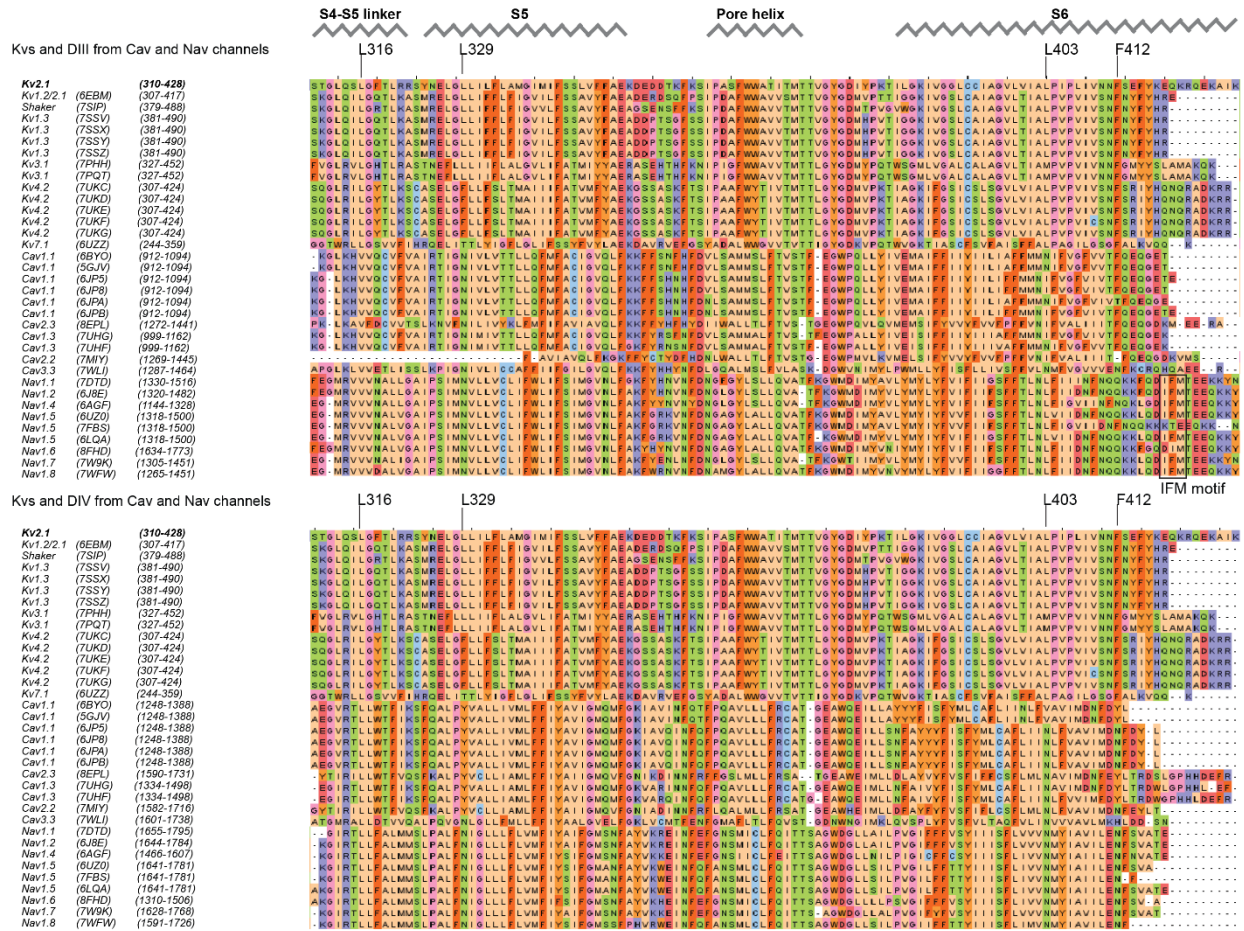

### Supplementary Information Figure 3 | Structure-based sequence alignment of Kv, Cav and Nav channels

Structure-based sequence alignment of residues from the S4-S5 linker to the end of S6 with residues colored based on side chain character. Residues identified within the hydrophobic coupling nexus are highlighted as well as other regions of interest (IFM motif).



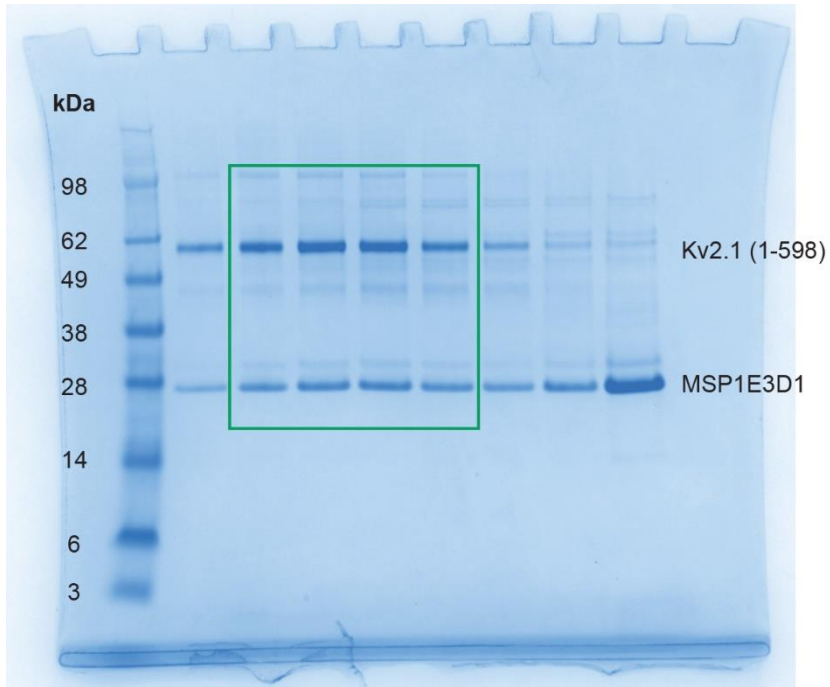

Supplementary Information Figure 4|  
Uncropped gel from Extended Data Fig. 1d
